# Supplementary material for: Activation of IP3 receptors requires an endogenous 1-8-14 calmodulin-binding motif
Source: PubMed Central journal article supplement (PMC3685217; doi:10.1042/bj20121034), 2012-12-07
Supplement: bj4490039add.pdf [file bj4490039add.pdf]

## SUPPLEMENTARY ONLINE DATA

# Activation of IP<sub>3</sub> receptors requires an endogenous 1-8-14 calmodulin-binding motif

Yi SUN<sup>1,2</sup>, Ana M. ROSSI<sup>1</sup>, Taufiq RAHMAN and Colin W. TAYLOR<sup>3</sup>

Department of Pharmacology, University of Cambridge, Cambridge CB2 1PD, U.K.

|                   |                    |     | 1     | 8              | 14       |             |        |
|-------------------|--------------------|-----|-------|----------------|----------|-------------|--------|
| MLCK peptide      |                    |     | RRK   | WQKTGHAVRAIGRL |          |             | +6     |
| 1-8-14 consensus  |                    |     | 1     | XXX5XX8        | XXXXXX14 |             |        |
| rat               | IP <sub>3</sub> R1 | 46  | LNNPP | KKFRDCLF       | KLC      | PMNRYSAQKQ  | 71 +4  |
| rat               | IP <sub>3</sub> R2 | 46  | LTNPP | KKFRDCLF       | KVC      | PMNRYSAQKQ  | 71 +4  |
| rat               | IP <sub>3</sub> R3 | 45  | LDNPP | KKFRDCLF       | KVC      | PMNRYSAQKQ  | 70 +4  |
| chicken           | IP <sub>3</sub> R1 | 46  | LNNPP | KKFRDCLF       | KLC      | PMNRYSAQKQ  | 71 +4  |
| chicken           | IP <sub>3</sub> R2 | 48  | LANPP | KKFRDCLF       | KVC      | PMNRYSAQKQ  | 73 +4  |
| chicken           | IP <sub>3</sub> R3 | 45  | LDNPP | KKFRDCLF       | KVC      | PMNRYSAQKQ  | 70 +4  |
| frog              | IP <sub>3</sub> R1 | 46  | LNNPP | KKFRDCLF       | RLC      | PMNRYSAQKQ  | 71 +4  |
| frog              | IP <sub>3</sub> R2 | 46  | LANPP | KKFRDCLF       | KVC      | PMNRYSAQKQ  | 71 +4  |
| frog              | IP <sub>3</sub> R3 | 45  | LDNPP | KKFRDCLF       | RVC      | PMNRYSAQKQ  | 70 +4  |
| <i>Drosophila</i> | IP <sub>3</sub> R  | 49  | LSCPP | KKFRDCLI       | KIC      | PMNRYSAQKQ  | 74 +4  |
| <i>C. elegans</i> | IP <sub>3</sub> R  | 124 | PESPP | KKFRDCLF       | KVC      | PVNRYSAAQKH | 149 +4 |
| rabbit            | RyR1               | 59  | PP-DL | AICCF          | TL       | EQSLSV      | 75 -2  |
| rabbit            | RyR2               | 59  | PP-DL | SICTF          | VLE      | QSLLV       | 75 -2  |
| rabbit            | RyR3               | 59  | PP-DL | CVCNF          | VLE      | OSLSV       | 75 -2  |

**Figure S1 A conserved 1-8-14 motif in all IP<sub>3</sub>Rs and RyRs**

Alignments (with first and last residues numbered) of the N-terminal region of rat IP<sub>3</sub>R1–IP<sub>3</sub>R3 (SwissProt accession numbers NP\_001007236, NP\_112308 and NP\_037270 respectively), chicken IP<sub>3</sub>R1–IP<sub>3</sub>R3 (SwissProt accession numbers XP\_414438, XP\_001235613 and XP\_418035 respectively), *Xenopus* IP<sub>3</sub>R1–IP<sub>3</sub>R3 (SwissProt accession numbers NP\_001084015, ABP88141 and ABP88140 respectively), *Drosophila* IP<sub>3</sub>R (SwissProt accession number NP\_730942), *Caenorhabditis elegans* IP<sub>3</sub>R (SwissProt accession number NP\_001023170) and rabbit RyR1–RyR3 (SwissProt accession numbers P11716, P30957 and Q9TS33 respectively) highlighting the residues proposed to form a 1-8-14 CaM-binding motif. The consensus sequence for a 1-8-14 motif is shown in the first row, with its three critical (1, 8 and 14 hydrophobic residues) and net charge of +3 to +6. A similar 1-8-14 motif is conserved in all IP<sub>3</sub>R, which closely resembles a type A (1-5-8-14) motif, where position 5 is also a large hydrophobic residue. The motif within IP<sub>3</sub>Rs differs from a classic 1-8-14 consensus sequence by having a tyrosine residue at position 14. All subtypes of RyR also have a similar 1-8-14 motif within a similar position in the three-dimensional structure, although the sequence lacks the usual net positive charge of a consensus 1-8-14 motif.

<sup>1</sup> These authors contributed equally to this work.

<sup>2</sup> Present address: Wellcome Trust Sanger Institute, Wellcome Trust Genome Campus, Hinxton, Cambridge CB10 1SA, U.K.

<sup>3</sup> To whom correspondence should be addressed (email cwt1000@cam.ac.uk).

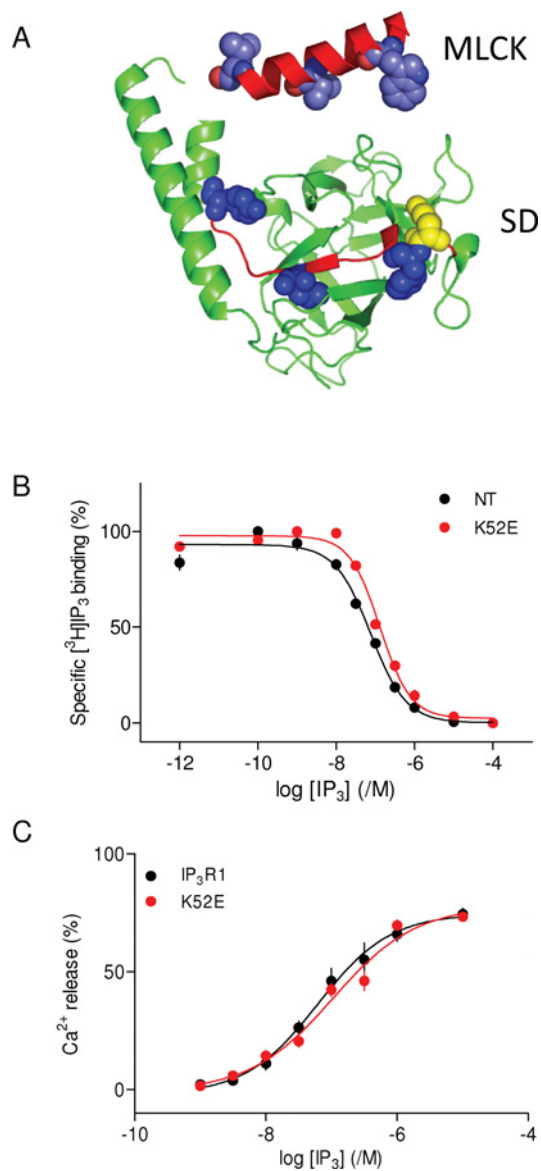

**Figure S2 Mutation of a non-critical residue (K52E) within the 1-8-14 motif has no effect on  $\text{IP}_3$  binding or  $\text{IP}_3$ -evoked  $\text{Ca}^{2+}$  release**

(A) Structure of the SD of  $\text{IP}_3\text{R1}$  (PDB code 1XZZ) highlighting the 1-8-14 motif (red), the critical 1-8-14 hydrophobic residues (blue) and  $\text{Lys}^{52}$  (yellow). (B) Equilibrium competition binding of  $\text{IP}_3$  (with 0.75 nM  $^3\text{H}]\text{IP}_3$ ) to native NT and  $\text{NT}^{\text{K52E}}$ . (C)  $\text{IP}_3$ -evoked  $\text{Ca}^{2+}$  release from DT40- $\text{IP}_3\text{R1}$  and DT40- $\text{IP}_3\text{R1}^{\text{K52E}}$  cells. Results are means  $\pm$  S.E.M. ( $n \geq 3$ ).

**Table S1 Peptides used in the present study**

All peptides were synthesised by Sigma or New England Peptide. The isoelectric point (pI) is shown for each peptide calculated from <http://www.innovagen.se/custom-peptide-synthesis/peptide-property-calculator/peptide-property-calculator.asp>. Ac, acetyl.

| Peptide             | Sequence                                         | Source                                                                             | pI   |
|---------------------|--------------------------------------------------|------------------------------------------------------------------------------------|------|
| MLCK                | Ac-RRKWQKTGHAVRAIGRL-NH <sub>2</sub>             | Ca <sup>2+</sup> –CaM-binding site of smooth muscle MLCK                           | 14.0 |
| 1-8-14              | Ac-KKFRDALFKLAPMNRV-NH <sub>2</sub>              | Fragment of IP <sub>3</sub> R1 (residues 51–66) containing the 1-8-14 motif        | 11.6 |
| 1-8-14 <sup>C</sup> | Ac-KKERDALFKLAPMNRV-NH <sub>2</sub>              | Inactive form of 1-8-14 peptide (mutations highlighted in bold and underlined)     | 10.8 |
| 1-8-14 <sup>S</sup> | Ac-AMRFLKYLKRFDKNA-NH <sub>2</sub>               | Scrambled form of 1-8-14 peptide                                                   | 11.6 |
| 1-8-14 <sup>L</sup> | Ac-LNNPPKFRDALFKLAPMNRVSAQKQFWKA-NH <sub>2</sub> | Longer fragment of IP <sub>3</sub> R1 (residues 46–75) containing the 1-8-14 motif | 11.7 |

**Table S2 Primers used in the present study**

Primers used for introducing mutations in the N-terminal fragment or full-length IP<sub>3</sub>R1. The mutated bases are highlighted.

| Primer       | Sequence (5'→3')                                             |
|--------------|--------------------------------------------------------------|
| F53E Forward | GGGGACCTTAACAATCCACCCAAGAAA <b>GAG</b> AGAGACTGCCTCTT        |
| F53E Reverse | AAGAGGCAGTCTCT <b>CTC</b> TTTCTTGGGTGGATTGTTAAGGTCCCC        |
| L60E Forward | GAAATTCAGAGACTGCCTCTTTA <b>GGAG</b> TGTCCTATGAATCGATATTCTGCA |
| L60E Reverse | TGCAGAATATCGATTCATAGGAC <b>ACTC</b> CTTAAAGAGGCAGTCTCTGAATTC |
| Y66E Forward | CTCTTTAAGCTATGTCCTATGAATCGA <b>GAG</b> TCTGCACAGAAGCAG       |
| Y66E Reverse | CTGCTTCTGTGCAG <b>ACTC</b> TGATTTCATAGGACATAGCTTAAAGAG       |
| K52E Forward | AACAATCCACCCAAG <b>GAA</b> TTCAGAGACTGCCTC                   |
| K52E Reverse | GAGGCAGTCTCTGAAT <b>TTC</b> CTTGGGTGGATTGTT                  |

Received 26 June 2012/13 September 2012; accepted 26 September 2012  
Published as BJ Immediate Publication 26 September 2012, doi:10.1042/BJ20121034
